# Supplementary material for: A Digital Intervention Addressing Alcohol Use Problems (the “Daybreak” Program): Quasi-Experimental Randomized Controlled Trial
Source: PubMed Central journal article supplement (PMC6753690; doi:10.2196/14967), 2019-09-04
Supplement: jmir_v21i9e14967_app2.pdf [file jmir_v21i9e14967_app2.pdf]

Supplementary file 2: Outcomes by randomized groups

| Variable                                               | Intervention                |                   |                  | Control                       |                             |                   | All participants              |                             |                  |
|--------------------------------------------------------|-----------------------------|-------------------|------------------|-------------------------------|-----------------------------|-------------------|-------------------------------|-----------------------------|------------------|
|                                                        | Baseline<br>n= 398          | 1 month<br>n=179  | 3 month<br>n=150 | Baseline<br>n= 395            | 1 month<br>n=155            | 3 month<br>n=143  | Baseline<br>n=793             | 1 month<br>n=334            | 3 month<br>n=293 |
| AUDIT-C<br><i>M (SD)</i>                               | 9.04<br>(1.89)              | 6.20<br>(3.02)    | 5.78<br>(3.01)   | 9.19<br>(1.94)                | 5.82<br>(3.02)              | 5.78<br>(3.14)    | 9.11<br>(1.92)                | 6.02<br>(3.02)              | 5.78<br>(3.07)   |
| Alcohol days<br>out of role<br><i>M (SD)</i>           | 1.82<br>(4.12) <sup>a</sup> | 0.84<br>(3.20)    | 0.67<br>(2.14)   | 1.35<br>(2.84) <sup>b</sup>   | 0.32<br>(1.04) <sup>c</sup> | 0.27<br>(0.76)    | 1.59<br>(3.55) <sup>d</sup>   | 0.60<br>(2.46) <sup>c</sup> | 0.48<br>(1.63)   |
| <i>Median (IQR)</i>                                    | 1 (0-30) <sup>a</sup>       | 0 (0-30)          | 0 (0-15)         | 0 (0-20) <sup>b</sup>         | 0 (0-10) <sup>c</sup>       | 0 (0-4)           | 0 (0-30) <sup>d</sup>         | 0 (0-30) <sup>c</sup>       | 0 (0-15)         |
| Alcohol use,<br>last 7 days<br><i>M (SD)</i>           | 37.45<br>(31.09)            | 17.54<br>(19.87)  | 18.22<br>(18.18) | 36.77<br>(25.27) <sup>c</sup> | 16.39<br>(23.41)            | 16.73<br>(19.64)  | 37.12<br>(28.33) <sup>c</sup> | 17.01<br>(21.56)            | 17.49<br>(18.89) |
| Kessler-10<br><i>M (SD)</i>                            | 24.54<br>(6.99)             | 19.40<br>(6.75)   | 18.53<br>(6.59)  | 25.04<br>(7.07)               | 20.32<br>(6.72)             | 19.44<br>(6.61)   | 24.79<br>(7.03)               | 19.82<br>(6.74)             | 18.97<br>(6.61)  |
| EUROHIS-QoL<br><i>M (SD)</i>                           | 3.16<br>(0.70)              | 3.52<br>(0.69)    | 3.56<br>(0.70)   | 3.14<br>(0.71)                | 3.49<br>(0.76)              | 3.58<br>(0.70)    | 3.15<br>(0.70)                | 3.51<br>(0.73)              | 3.57<br>(0.70)   |
| Sleep Quality<br><i>M (SD)</i>                         | 1.71<br>(0.71) <sup>c</sup> | 1.32<br>(0.73)    | 1.32<br>(0.77)   | 1.69<br>(0.76) <sup>f</sup>   | 1.21<br>(0.76)              | 1.21<br>(0.73)    | 1.70<br>(0.74) <sup>e</sup>   | 1.27<br>(0.74)              | 1.27<br>(0.75)   |
| Exercise<br><i>M (SD)</i>                              | 59.32<br>(183.43)           | 63.14<br>(174.22) | 45.37<br>(36.18) | 51.34<br>(114.83)             | 90.89<br>(308.48)           | 59.05<br>(135.02) | 55.34<br>(153.10)             | 76.02<br>(245.81)           | 52.05<br>(97.88) |
| Health<br>service use<br>last 8 weeks<br><i>M (SD)</i> | 4.33<br>(5.49)              | 4.42<br>(12.52)   | 3.66<br>(4.44)   | 4.00<br>(5.29)                | 3.54<br>(4.75)              | 3.08<br>(4.05)    | 4.17<br>(5.39)                | 4.01<br>(9.71)              | 3.38<br>(4.26)   |

IQR = Interquartile range: M = mean: Exercise in Metabolic equivalents (METs) : SD = standard deviation

Missing values: a: 5, b: 6, c: 1, d: 11, e: 4, f: 3
